1 **Carbon content, carbon fixation yield and dissolved organic carbon**  
2 **release from diverse marine nitrifiers**

3 Barbara Bayer<sup>1,2\*</sup>, Kelsey McBeain<sup>1,3</sup>, Craig A. Carlson<sup>1</sup>, and Alyson E. Santoro<sup>1</sup>

4

5 <sup>1</sup> Department of Ecology, Evolution and Marine Biology, University of California, Santa Barbara,  
6 CA, USA

7 <sup>2</sup> Current address: Department of Microbiology and Ecosystem Science, University of Vienna,  
8 Vienna, Austria

9 <sup>3</sup> Current address: Department of Oceanography, University of Hawai'i at Manoa, Honolulu, HI,  
10 USA

11 \*Correspondence: [bbayer@ucsb.edu](mailto:bbayer@ucsb.edu) or [barbara.bayer@univie.ac.at](mailto:barbara.bayer@univie.ac.at)

12

13 Running head: C fixation and release by nitrifiers

14

15 Author contribution: BB and AES designed the study. BB and KM conducted laboratory  
16 experiments. BB analyzed the data and drafted the initial manuscript. AES and CAC contributed  
17 to revision and editing of the final manuscript.

18

19 Keywords: Cellular C quota, DIC fixation yield, DOC release, nitrification, ammonia-oxidizing  
20 archaea, nitrite-oxidizing bacteria

21

22 Data availability statement: Data and metadata will be made available in the BCO-DMO data  
23 repository

## 24 **Abstract**

25 Nitrifying microorganisms, including ammonia-oxidizing archaea, ammonia-oxidizing bacteria  
26 and nitrite-oxidizing bacteria, are the most abundant chemoautotrophs in the ocean and play an  
27 important role in the global carbon cycle by fixing dissolved inorganic carbon (DIC) into biomass.  
28 The release of organic compounds by these microbes is less well known but may represent an  
29 as-yet unaccounted source of dissolved organic carbon (DOC) available to heterotrophic marine  
30 food webs. Here, we provide measurements of cellular carbon and nitrogen quotas, DIC fixation  
31 yields and DOC release of ten phylogenetically diverse marine nitrifiers grown in multiple culture  
32 conditions. All investigated strains released DOC during growth, making up on average 5-15% of  
33 the fixed DIC. Neither substrate concentration nor temperature affected the proportion of fixed  
34 DIC released as DOC, but release rates varied between closely related species. Our results also  
35 indicate previous studies may have underestimated DIC fixation yields of marine nitrite oxidizers  
36 due to partial decoupling of nitrite oxidation from CO<sub>2</sub> fixation, and due to lower observed yields  
37 in artificial compared to natural seawater medium. The results of this study provide values for  
38 biogeochemical models of the global carbon cycle, and help to further constrain the implications  
39 of nitrification-fueled chemoautotrophy for marine food-web functioning and the biological  
40 sequestration of carbon in the ocean.

41

## 42 **Introduction**

43 Marine microorganisms play a critical role in the global carbon cycle through their transformations  
44 of organic and inorganic carbon constituents. A fraction of the carbon dioxide (CO<sub>2</sub>) that is  
45 captured by phytoplankton in the surface ocean sinks to depth as dead organic material,  
46 supporting a mesopelagic food web of both microbes and higher trophic levels (Hannides et al.  
47 2013; Giering et al. 2014; Choy et al. 2015). Organic matter decomposition in the mesopelagic  
48 also releases ammonium, a reduced form of nitrogen that can be used as an energy source by

49 chemoautotrophic nitrifying archaea and bacteria to fuel dissolved inorganic carbon (DIC) fixation  
50 into biomass (Ward 2011). Chemoautotrophic production provides a new, labile, non-sinking  
51 source of particulate organic matter to the deep ocean which is otherwise dominated by refractory  
52 organic carbon (Reinthal et al. 2010; Middelburg 2011), supporting a significant fraction of the  
53 heterotrophic microbial community in the mesopelagic (Hansman et al. 2009).

54 The main nitrifiers in the ocean are ammonia-oxidizing archaea (AOA), which oxidize  
55 ammonia ( $\text{NH}_3$ ) to nitrite ( $\text{NO}_2^-$ ), and nitrite-oxidizing bacteria (NOB), which further oxidize  $\text{NO}_2^-$   
56 to nitrate ( $\text{NO}_3^-$ ) (Ward 2011). These two steps are assumed to be tightly coupled, as  $\text{NO}_2^-$   
57 typically does not accumulate in oxic open ocean waters (with the exception of the primary nitrite  
58 maximum at the base of the euphotic zone (Lomas and Lipschultz 2006; Santoro et al. 2013)).  
59 Despite this tight coupling, AOA are approximately six times more abundant than NOB at a given  
60 location and sampling depth (Santoro et al. 2019), possibly owing to their smaller cell size  
61 compared to NOB (Watson and Waterbury 1971; Könneke et al. 2005; Santoro and Casciotti  
62 2011; Bayer et al. 2016; Mueller et al. 2021), or as a result of the higher theoretical energy yield  
63 from ammonia compared to nitrite oxidation (Bock and Wagner 2013). Ammonia-oxidizing  
64 bacteria (AOB) are thought to play a minor role in global ocean nitrification due to their overall low  
65 abundances (Santoro et al. 2010; Buchwald et al. 2015; Tolar et al. 2016).

66 Despite the known difference in theoretical energy yield, there are many uncertainties  
67 regarding the organic carbon yield from ammonia versus nitrite oxidation (hereinafter referred to  
68 as DIC fixation yield) and the contribution of both functional groups to chemoautotrophic DIC  
69 fixation in the ocean. AOA cultures have recently been shown to release dissolved organic carbon  
70 (DOC) during growth (Bayer et al. 2019a), pointing to a potential loss of cellular fixed carbon that  
71 is not captured by conventional methods measuring DIC incorporation into biomass. The release  
72 of DOC by nitrifiers might represent an as-yet unaccounted source of organic material in the deep  
73 ocean potentially fueling the microbial loop, with important implications for the marine carbon  
74 cycle. However, it remains unclear if DOC release is a phenomenon only observed under specific

75 culture conditions restricted to some AOA, or a common feature shared by diverse autotrophic  
76 nitrifiers under natural conditions.

77 Here, we report combined measurements of DIC fixation and DOC release of ten  
78 phylogenetically diverse marine nitrifiers comprising two AOA genera (*Nitrosopumilus* and *Ca.*  
79 *Nitrosopelagicus*), one AOB genus (*Nitrosomonas*) and three NOB genera (*Nitrospina*, *Nitrospira*,  
80 and *Nitrococcus*), and further explore the effect of substrate concentration, temperature, and  
81 different culture media on these measurements. The results of this study will inform ecological  
82 theoretical models to further constrain DIC fixation yields associated with nitrification in order to  
83 better understand the dynamics involved in the sequestration of carbon in the ocean.

84

## 85 **Methods**

### 86 ***Nitrifier culture sources***

87 The AOA cultures used in this study were three axenic *Nitrosopumilus* strains and one  
88 *Nitrosopelagicus* enrichment culture. *Ca. Nitrosopelagicus brevis* U25 originates from a North  
89 Pacific Ocean water sample (Santoro and Casciotti 2011; Carini et al. 2018). The level of  
90 enrichment during the time of this study was ~90%. *Nitrosopumilus* sp. CCS1 is a novel AOA  
91 strain isolated from a seawater sample collected from the California Current system in the North  
92 Pacific Ocean (Santoro et al, unpublished). *Nitrosopumilus adriaticus* NF5 (=JCM 32270<sup>T</sup>  
93 =NCIMB 15114<sup>T</sup>) and *Nitrosopumilus piranensis* D3C (=JCM 32271<sup>T</sup> =DSM 106147<sup>T</sup> =NCIMB  
94 15115<sup>T</sup>) were isolated from the Northern Adriatic Sea and have been described in detail (Bayer  
95 et al. 2016, 2019).

96 The four axenic NOB strains, *Nitrospina gracilis* Nb-211, *Nitrospina* sp. Nb-3, *Nitrococcus*  
97 *mobilis* Nb-231 and *Nitrospira marina* Nb-295, were obtained from the culture collection of John  
98 B. Waterbury and Frederica Valois at the Woods Hole Oceanographic Institution (WHOI). *N.*  
99 *gracilis* Nb-211 was isolated from surface waters of the South Atlantic Ocean (Watson and

100 Waterbury 1971), *N. mobilis* Nb-231 was isolated from a surface water sample obtained from the  
101 South Pacific Ocean (Watson and Waterbury 1971) and *N. marina* Nb-295 was isolated from a  
102 water sample collected at a depth of 206 m from the Gulf of Maine in the Atlantic Ocean (Watson  
103 et al. 1986). *Nitrospina* sp. Nb-3 was isolated from the Pacific Ocean off the coast of Peru and  
104 has not yet been officially described (Watson and Waterbury, unpublished), however, it shares a  
105 high 16S rRNA gene sequence similarity with strain 3/211 (Lücker et al. 2013).

106 AOB strains used in this study, *Nitrosomonas marina* C-25 and *Nitrosomonas* sp. C-15  
107 (also known as strain Nm51, (Koops et al. 1991)), were both obtained from the culture collection  
108 of John B. Waterbury and Frederica Valois at WHOI and were revived from 60-year old  
109 cryostocks. Strain C-15 was isolated from surface water (1 m depth) of the South Pacific Ocean  
110 off the Peruvian continental shelf (Watson and Mandel 1971) and strain C-25 was isolated from  
111 surface waters of the South Atlantic Ocean (200 miles off the Amazon River mouth) (Watson and  
112 Mandel 1971).

113

#### 114 **Culture conditions**

115 *Nitrosopumilus adriaticus* NF5, *Nitrosopumilus piranensis* D3C, *Nitrosomonas marina* C-25 and  
116 *Nitrosomonas* sp. C-15 were grown in HEPES-buffered artificial seawater medium containing 1  
117 mM NH<sub>4</sub>Cl, and *Ca. Nitrosopelagicus brevis* U25 was grown in natural seawater medium  
118 containing 50 µM NH<sub>4</sub>Cl. *Nitrospina gracilis* Nb-211, *Nitrospira marina* Nb-295 and *Nitrococcus*  
119 *mobilis* Nb-231 were grown in artificial seawater medium supplemented with 1 mM NaNO<sub>2</sub>.  
120 *Nitrosopumilus* sp. CCS1 and *Nitrospina* sp. Nb-3 were grown under multiple culture conditions  
121 as indicated in the Results and Discussion. All strains were routinely grown in 60 mL  
122 polycarbonate bottles (Nalgene) containing 50 mL culture medium, and bottles were incubated at  
123 either 15°C or 25°C (with the exception of *Ca. Nitrosopelagicus brevis* which was always  
124 incubated at 22°C) in the dark without agitation.

125 The artificial seawater medium contained 18.54 g L<sup>-1</sup> NaCl, 4.7 g L<sup>-1</sup> MgSO<sub>4</sub> × 7H<sub>2</sub>O, 3.55  
126 g L<sup>-1</sup> MgCl<sub>2</sub> × 6H<sub>2</sub>O, 1.03 g L<sup>-1</sup> CaCl<sub>2</sub> × 2H<sub>2</sub>O, 0.51 g L<sup>-1</sup> KCl, 0.14 g L<sup>-1</sup> NaHCO<sub>3</sub>. The natural  
127 seawater medium consisted of aged seawater collected from the Santa Barbara Channel (approx.  
128 10 m depth at, 0.2 µm pore size filtered). Artificial and natural seawater were supplemented with  
129 2.6 mg L<sup>-1</sup> K<sub>2</sub>HPO<sub>4</sub>, 250 µg L<sup>-1</sup> FeNaEDTA, 30 µg L<sup>-1</sup> H<sub>3</sub>BO<sub>3</sub>, 20 µg L<sup>-1</sup> MnCl<sub>2</sub> × 4H<sub>2</sub>O, 20 µg L<sup>-1</sup>  
130 CoCl<sub>2</sub> × 6H<sub>2</sub>O, 24 µg L<sup>-1</sup> NiCl<sub>2</sub> × 6H<sub>2</sub>O, 20 µg L<sup>-1</sup> CuCl<sub>2</sub> × 2H<sub>2</sub>O, 144 µg L<sup>-1</sup> ZnSO<sub>4</sub> × 7H<sub>2</sub>O, 24 µg  
131 L<sup>-1</sup> Na<sub>2</sub>MoO<sub>4</sub> × 2H<sub>2</sub>O. The pH was adjusted to 7.8-8.0 with NaOH or HCl. Due to the pH decrease  
132 associated with ammonia oxidation, culture medium with high initial NH<sub>4</sub><sup>+</sup> concentrations (>250  
133 µM) was buffered by addition of 10 mM HEPES (pH 7.8). AOA cultures were supplemented with  
134 50 U L<sup>-1</sup> catalase (Sigma-Aldrich, Cat. Nr. C9322) to reduce oxidative stress and NOB cultures  
135 were supplemented with 50 ng L<sup>-1</sup> cyanocobalamin. To test the effect of reduced and organic  
136 nitrogen compounds on *Nitrospina sp.* Nb-3, NH<sub>4</sub>Cl (50 µM) or tryptone (150 mg L<sup>-1</sup>) were added  
137 to the culture medium.

138 NO<sub>2</sub><sup>-</sup> concentrations were measured using the Griess-Ilosvay colorimetric method  
139 (Strickland and Parsons 1972) and enumeration of cells was performed on an Easy-Cyte flow  
140 cytometer (Guava Technologies) following SYBR Green staining as previously described (Bayer  
141 et al. 2021).

142

### 143 **Cellular carbon and nitrogen content measurements**

144 To determine C : N ratios, ca. 100-500 mL of culture was filtered onto combusted (450°C, 4h)  
145 glass fiber filters (Advantec, GF-75, 25mm). Filters were acidified with HCl (10% v/v), dried (60°C,  
146 24 h), and packed into tin capsules prior to being analyzed on a CHN elemental analyzer (Exeter  
147 Analytical, CEC 440HA). The instrument was calibrated with acetanilide following manufacturer  
148 protocols.

149 Cellular carbon (C) content was calculated using both, CHN elemental analyzer (only for large  
150 cells) and  $^{14}\text{C}$ -DIC incorporation measurements (see below), divided by the number of newly  
151 produced cells. Additionally, C content of the AOA strain *Nitrosopumilus* sp. CCS1 was calculated  
152 from a dilution series of concentrated cells as described in (White et al. 2019). Cells were  
153 concentrated using tangential flow filtration (Pellicon) and a dilution series of  $1.1$  to  $5.6 \times 10^{11}$  cells  
154  $\text{L}^{-1}$  was constructed by resuspending cell concentrates in culture medium (Fig. S1). The total organic  
155 C content for each vial of the dilution series was directly measured by high temperature combustion  
156 using a modified Shimadzu TOC-V as described in (Carlson et al. 2010). C content per cell was  
157 calculated via linear regression of cell counts and elemental content over the dilution series, where  
158 the slope of a Model II least squares regression is considered the elemental content per cell (Fig.  
159 S1).

160

#### 161 ***Combined DIC fixation and DOC release measurements***

162 DIC fixation was measured via the incorporation of [ $^{14}\text{C}$ ]-bicarbonate as previously described  
163 (Herndl et al. 2005) with modifications. [ $^{14}\text{C}$ ]-bicarbonate (specific activity  $56 \text{ mCi mmol}^{-1}/2.072 \times$   
164  $10^9 \text{ Bq mmol}^{-1}$ , Perkin Elmer) was added to 5 mL of culture (between 10-60  $\mu\text{Ci}$  were added  
165 depending on the activity of the culture). Different incubation times were tested (see Results  
166 section) and all consecutive experiments were performed over the entire length of the growth  
167 curve. For every culture condition, at least three replicate live samples and one formaldehyde-  
168 fixed blank (3% v/v) were incubated in temperature-controlled incubators in the dark. Parallel  
169 incubations without [ $^{14}\text{C}$ ]-tracer additions were used to determine cell abundance and nitrite  
170 concentration (see above).

171 Incubations were terminated by adding formaldehyde (3% v/v) to 5 mL of sample. After  
172 30-60 min, every sample was individually filtered onto 25 mm, 0.2  $\mu\text{m}$  pore size polycarbonate  
173 filters (Millipore) and rinsed with 0.5 mL of artificial seawater using a glass filtration set (Millipore).

174 The individual filtrates (5.5 mL per sample) were collected and transferred to scintillation vials to  
175 determine the fraction of [<sup>14</sup>C]-dissolved organic carbon ([<sup>14</sup>C]-DOC). Excess [<sup>14</sup>C]-bicarbonate  
176 from the filters was removed by exposing them to fumes of concentrated HCl (37 %) for 24 h. The  
177 filters were transferred to scintillation vials and 10 mL of scintillation cocktail (Ultima Gold, Perkin  
178 Elmer) was added. The filtrates were acidified to pH ~2 with HCl (25 %) as previously described  
179 (Marañón et al. 2004), and filtrates were kept for 24 h in open scintillation vials placed on an orbital  
180 shaker before 10 mL scintillation cocktail was added to each vial. Samples were shaken for ca.  
181 30 sec and incubated in the dark for at least 24 hours prior to counting the disintegrations per  
182 minute (DPM) in a scintillation counter (Beckman Coulter LS6500) for 15 min.

183 Total radioactivity measurements were performed to verify added [<sup>14</sup>C]-bicarbonate  
184 concentrations by pipetting 100µl of sample into scintillation vials containing 400µl beta-  
185 phenylethylamine (to prevent outgassing of <sup>14</sup>CO<sub>2</sub>). Scintillation cocktail was added, vials were  
186 shaken for ca. 30 sec and immediately measured in the scintillation counter.

187

188 The resulting mean DPM of the samples were corrected for the DPM of the blank, converted into  
189 organic carbon fixed over time and corrected for the DIC concentration in the culture media.

190

191 DIC fixation rates were calculated using the following formula:

192

$$193 \quad (DPM_s - DPM_b) \times DIC_w / (DPM_{tr} \times \text{inc. time})$$

194

195 where DPM are the disintegrations per minute measured in the scintillation counter, for the sample  
196 (s) and the blank (b). DIC<sub>w</sub> denotes the dissolved inorganic carbon concentration in culture  
197 medium and DPM tracer (tr) is the DPM for the [<sup>14</sup>C]-bicarbonate added to the incubations.

198

199 ***DIC concentration measurements***



200 Total alkalinity (TA) of unfixed natural and artificial seawater medium was measured via an open-  
201 cell endpoint titration using a Mettler-Toledo T5 autotitrator, and pH was measured  
202 spectrophotometrically using a Shimadzu UV-1280 UV-VIS spectrophotometer as described  
203 previously (Dickson et al. 2007; Hoshijima and Hofmann 2019). Dissolved inorganic carbon (DIC)  
204 concentrations were calculated from TA and pH using the CO2SYS software (Pelletier 2007). To  
205 calculate DIC concentrations of HEPES-buffered media, TA values were taken from unbuffered  
206 artificial seawater medium and the pH was re-measured after adding HEPES.

207

### 208 ***Calculations of Gibbs free energy ( $\Delta G$ )***

209 The effective Gibbs free energy ( $\Delta G$ ) for ammonia and nitrite oxidation was calculated for the  
210 culture conditions in this study using the following formula:

$$211 \Delta G = \Delta G^{\circ} + RT \ln Q$$

212

213 where  $R$  is the ideal gas constant (8.314 J mol<sup>-1</sup> K),  $Q$  is the reaction quotient, and  $T$  is the  
214 temperature in Kelvin.  $\Delta G^{\circ}$  values were obtained from (Amend and Shock 2001).

215

216  $Q$  was calculated based on the following measurements and estimates: NO<sub>2</sub><sup>-</sup> concentrations were  
217 measured directly (see above); [NO<sub>3</sub><sup>-</sup>] and [NH<sub>4</sub><sup>+</sup>] were estimated from the decrease or increase  
218 in [NO<sub>2</sub><sup>-</sup>], respectively; NH<sub>3</sub> concentrations were calculated based on [NH<sub>4</sub><sup>+</sup>], pH of the culture  
219 medium, and the acid association constant (pKa = 9.4); and O<sub>2</sub> concentrations were estimated to  
220 be 235 μM under completely oxic conditions during our incubations. A correction for ionic strength  
221 was applied according to (Amend and LaRowe 2019). Calculations can be found in the Supporting  
222 Information (Table S1).

223

### 224 ***Statistical analyses***

225 Pairwise comparisons were performed with a two-sided Mann-Whitney U Test  
226 (`pairwise.wilcox.test`) using the R software environment (R Core Team 2013). *P* values were  
227 adjusted for multiple comparisons using the Benjamini-Hochberg correction  
228 (`p.adjust.method="fdr"`) (Benjamini and Hochberg 1995).

229

## 230 **Results and Discussion**

### 231 ***Elemental composition of cultured nitrifiers***

232 We determined the cellular carbon (C) content of cultured isolates of ammonia-oxidizing archaea  
233 (AOA), ammonia-oxidizing bacteria (AOB) and nitrite-oxidizing bacteria (NOB) belonging to six  
234 different genera. The cellular C contents of AOA were ~11-17 fg C cell<sup>-1</sup> (Table 1), which is slightly  
235 higher than values reported for natural populations in the deep Atlantic Ocean (~8.39 fg cell<sup>-1</sup>,  
236 (Herndl et al. 2005)) and an AOA enrichment culture from the Baltic Sea (9 fg cell<sup>-1</sup>, (Berg et al.  
237 2014)), but much lower than values reported for AOA from hypoxic shelf waters of the Gulf of  
238 Mexico (50 ± 16 fg cell<sup>-1</sup>, (Kitzinger et al. 2020)). All investigated marine NOB had higher cellular  
239 C quotas compared to AOA (Table 1), with *Nitrospina* exhibiting the lowest (~28-55 fg C cell<sup>-1</sup>)  
240 and *Nitrococcus* the highest (~272-1207 fg C cell<sup>-1</sup>) values (Table 1). The C content of AOA cells  
241 remained fairly constant during different growth phases, while C contents of all investigated NOB  
242 strains drastically decreased (~40-70%) from early exponential growth to stationary phase, which  
243 was supported by the observation of smaller cells in stationary compared to exponentially growing  
244 cultures (data not shown). Cell sizes of natural populations of Nitrospinae bacteria have been  
245 reported to be 4-fold (Kitzinger et al. 2020) and 50-fold (Pachiadaki et al. 2017) larger than AOA  
246 cells, potentially reflecting these variations in cell size and C content during different growth  
247 phases.

248 The molar C : N ratios of all investigated nitrifiers were in the range of 3.4-4.6 : 1 (Table  
249 1), with the exception of previously published values of *Nitrosopumilus maritimus* NAOA6 (Meador  
250 et al. 2020) and two AOB strains (Glover 1985). The values observed are lower than values of

251 heterotrophic marine bacteria (~5 : 1) including *Pelagibacter ubique* (~4.6 : 1) (White et al. 2019),  
 252 *and references therein*), with *Nitrospina* cells exhibiting the lowest average C : N ratio (~3.4) of  
 253 all cultured nitrifiers in our study (Table 1). These low cellular C : N ratios are surprising  
 254 considering the observation of glycogen storage deposits in cells of *Nitrospina gracilis*,  
 255 *Nitrococcus mobilis*, and *Nitrospira marina* (Watson and Waterbury 1971; Watson et al. 1986), as  
 256 well as polyhydroxybutyrate storage in *Nitrococcus mobilis* (Watson and Waterbury 1971).

257

258 **Table 1.** Elemental stoichiometry of phylogenetically diverse cultured marine nitrifiers during different  
 259 growth phases (early exponential, late exponential, stationary) including previously published values. C : N  
 260 ratios were obtained during exponential growth phase. Cellular C content values are derived from DIC  
 261 incorporation measurements if not stated otherwise.

262

| Organism                               | C : N<br>(mol mol <sup>-1</sup> ) | Cellular C content (fg C cell <sup>-1</sup> ) |                                  |                                        | Ref.                     |
|----------------------------------------|-----------------------------------|-----------------------------------------------|----------------------------------|----------------------------------------|--------------------------|
|                                        |                                   | Early<br>exponential                          | Late<br>exponential              | Stationary                             |                          |
| <i>Ca. Nitrosopelagicus brevis</i> U25 | n.d.                              | n.d.                                          | 10.8                             | n.d.                                   | this study               |
| <i>Nitrosopumilus sp.</i> CCS1         | 4.03 ± 0.32                       | 11.8 ± 0.2                                    | 12.0 ± 2.0/<br>12.5 <sup>§</sup> | 12.9 ± 2.0/<br>16.3 ± 0.2 <sup>§</sup> | this study               |
| <i>Nitrosopumilus adriaticus</i> NF5   | 3.91                              | n.d.                                          | 16.7 ± 7.5                       | 17.3 ± 2.3                             | this study, <sup>2</sup> |
| <i>Nitrosopumilus piranensis</i> D3C   | 3.98                              | n.d.                                          | 16.3                             | 17.2 ± 1.9                             | this study, <sup>2</sup> |
| <i>Nitrosopumilus maritimus</i> NAOA6  | 5.8/5.9 <sup>+</sup>              | n.d.                                          | n.d.                             | 34 ± 14/<br>17 ± 6 <sup>+</sup>        | <sup>3</sup>             |
| <i>Nitrosomonas sp.</i> C-15           | 4.31 ± 0.11                       | n.d.                                          | 145.7 ± 11.1                     | 115.2 ± 3.8                            | this study               |
| <i>Nitrosomonas marina</i> C-25        | 4.38 ± 0.14                       | n.d.                                          | 302.4 ± 10.0                     | 159.7 ± 13.4                           | this study               |
| <i>Nitrosomonas marina</i>             | 5.59-6.11 <sup>*</sup>            | 241                                           | 139                              | 133                                    | <sup>1</sup>             |
| <i>Nitrosococcus oceani</i>            | 3.58-4.95 <sup>*</sup>            | 1115                                          | 961                              | 919                                    | <sup>1</sup>             |
| <i>Nitrospina gracilis</i> Nb-3        | 3.41 ± 0.05                       | 50.8 ± 3.9                                    | 40.1 ± 2.5                       | 28.4 ± 4.6                             | this study               |
| <i>Nitrospina gracilis</i> Nb-211      | 3.43 ± 0.18                       | 54.9 ± 4.9 <sup>#</sup>                       | n.d.                             | 30.4 ± 3.4                             | this study               |
| <i>Nitrospira marina</i> Nb-295        | 4.22 ± 0.03                       | 153.5 ± 18.1/<br>155.2 ± 6.5 <sup>#</sup>     | 69.5 ± 7.5                       | 57.8 ± 6.2                             | this study               |
| <i>Nitrococcus mobilis</i> Nb-231      | 4.60 ± 0.13                       | 994.6 ± 315.4/<br>1206.6 ± 156.1 <sup>#</sup> | 442.9 ± 38.0                     | 272.1 ± 60.7                           | this study               |
| <i>Nitrococcus mobilis</i>             | 3.07-4.75 <sup>*</sup>            | 1226                                          | 671                              | 384                                    | <sup>1</sup>             |

263

264 <sup>1</sup> Glover (1985); <sup>2</sup> Bayer et al. (2019c); <sup>3</sup> Meador et al. (2020)

265

266 \*Range of values obtained during different growth conditions  
267 & Value obtained from TOC dilution series (see Materials and Methods section and Fig. S1)  
268 # Values obtained from CHN elemental analyzer measurements (see Materials and Methods section)  
269 § Grown in HEPES-buffered medium  
270 + Values obtained under phosphate-replete and phosphate-deplete conditions (P replete/ P deplete)

271

272

### 273 **DIC fixation yields of marine nitrifiers**

274 We conducted combined measurements of DIC fixation, DOC release and ammonia/nitrite  
275 oxidation rates of ten nitrifier cultures. Here, we use the term ‘DIC fixation yield’ to describe the  
276 number of moles of inorganic carbon ( $\text{CO}_2$  or  $\text{HCO}_3^-$ ) that are fixed for every mole of N ( $\text{NH}_3$  or  
277  $\text{NO}_2^-$ ) oxidized, including the proportion that is released/lost as DOC.

278 Marine AOA, including three axenic *Nitrosopumilus* strains and one *Ca. Nitrosopelagicus*  
279 enrichment culture, exhibited the highest DIC fixation yields (mean $\pm$ sd=  $0.091 \pm 0.012$ ,  $n=47$ ) in  
280 our study, which were on average ~2-times higher than those of marine AOB (mean $\pm$ sd=  $0.047$   
281  $\pm 0.010$ ,  $n=23$ ) (Fig. 1). AOA encode the 3-hydroxypropionate/4-hydroxybutyrate (3-HP/4-HB)  
282 cycle for DIC fixation (Walker et al. 2010; Santoro et al. 2015; Bayer et al. 2016), which is  
283 suggested to be the most energy-efficient aerobic autotrophic DIC fixation pathway, requiring four  
284 moles of ATP to fix two moles of C (Könneke et al. 2014). In contrast, AOB use the Calvin-Benson-  
285 Bassham (CBB) cycle (Utåker et al. 2002; Stein et al. 2007), which has a higher ATP requirement  
286 and an estimated 20% loss of fixed DIC due to the oxygenase side-reaction of ribulose-1,5-  
287 biphosphate carboxylase/oxygenase (Berg 2011). DIC fixation yields of two *Nitrosopumilus*  
288 strains were recently reported to be up to ten times higher (0.18-1.2, (Meador et al. 2020))  
289 compared to values in our study and previously published values of *Nitrosopumilus adriaticus*  
290 NF5 (0.1, (Bayer et al. 2019c)) and a *Nitrosarchaeum* enrichment culture (0.1, (Berg et al. 2014)).  
291 However, such high values would require unrealistically high ATP yields (up to 2.4 moles ATP per  
292 mole  $\text{NH}_3$  oxidized) compared to reported estimates of 0.15-0.28 ATP/ $\text{NH}_3$  (mol/ mol) (Li et al.  
293 2018).

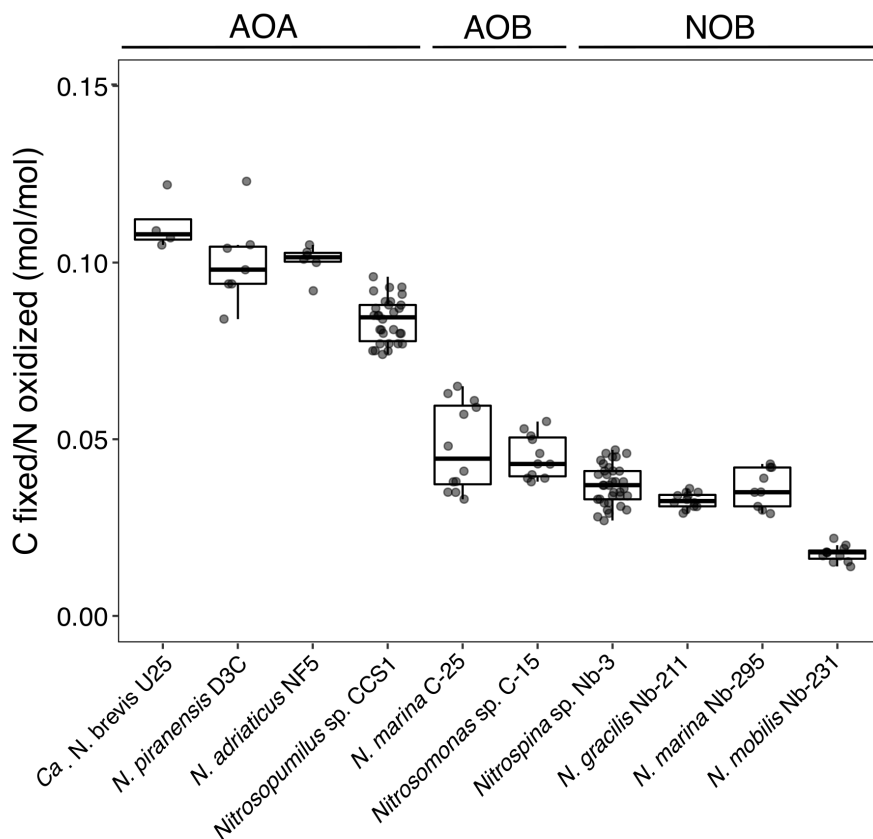

294  
295 **Fig.1** Comparison of DIC fixation yields of ten different phylogenetically diverse marine nitrifiers. Plotted  
296 values include both, the fraction of C incorporated into biomass and the fraction of C released as DOC. For  
297 NOB, only measurements conducted over the entire length of the growth curve (until stationary phase) are  
298 shown (see Fig. 2). Values obtained from cultures grown under different conditions (see Fig. 3 and Fig. S3)  
299 are included in this plot.

300  
301 DIC fixation yields of marine NOB (*Nitrospina/Nitrospira*: mean±sd=0.036 ± 0.005, n=47;  
302 *Nitrococcus*: mean±sd=0.018 ± 0.002, n=11) were lower compared to those of ammonia oxidizers  
303 (Fig. 1). *Nitrococcus mobilis*, which uses the CBB cycle for DIC fixation (Füssel et al. 2017) had  
304 ~2-times lower DIC fixation yields compared to *Nitrospina* and *Nitrospira* which use a O<sub>2</sub>-tolerant  
305 version of the reverse TCA cycle (Lücker et al. 2010, 2013). Zhang et al. (2020) measured ~1.7-  
306 times lower DIC fixation yields of *Nitrospina gracilis* 3/211 and a terrestrial *Nitrospira* isolate  
307 compared to values in our study. We observed that radiotracer incubations conducted over the  
308 entire length of the growth curve (until early stationary phase, see Fig. S2) resulted in ~1.4 to 1.7-

309 times higher DIC fixation yields of NOB compared to incubations conducted until late exponential  
310 growth (when  $\text{NO}_2^-$  was completely oxidized) (Fig. 2), suggesting that, in contrast to AOA where  
311 ammonia oxidation and DIC fixation were tightly coupled, nitrite oxidation might be partly  
312 decoupled from DIC fixation in NOB. While short incubation times (24 h) are typically favored over  
313 longer times for environmental measurements to avoid cross-feeding of reaction products, our  
314 results indicate that DIC fixation yields of NOB might be underestimated using these established  
315 protocols (Fig. 2).  
316

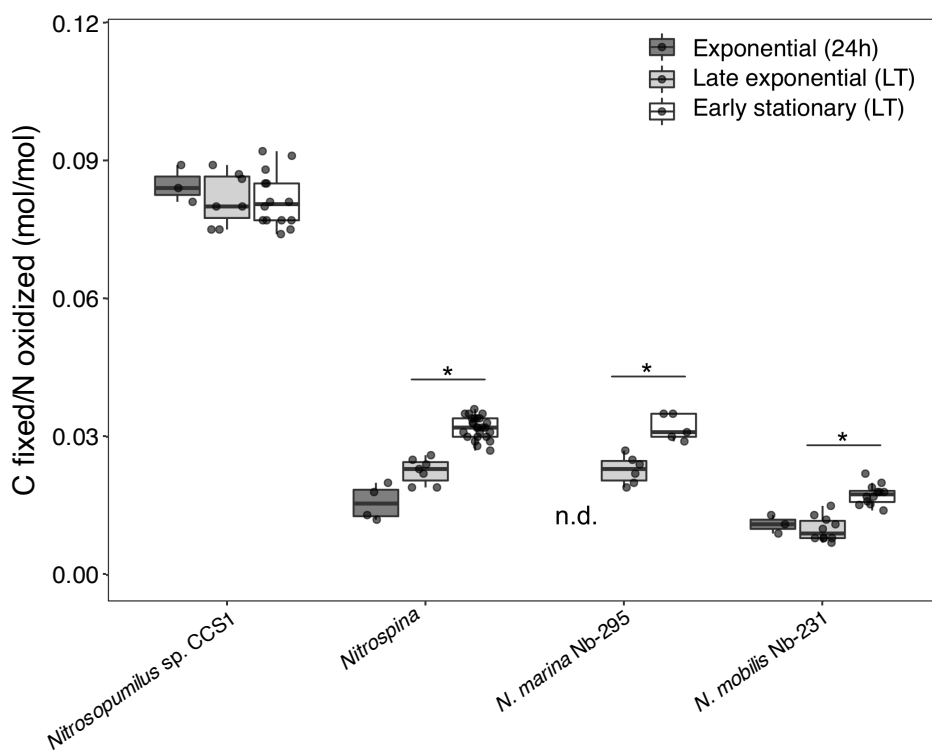

317  
318  
319 **Fig. 2** Comparison of DIC fixation yields obtained from short-term (24h) radiotracer incubations during  
320 exponential growth, and long-term (LT) radiotracer incubations carried out until either late exponential  
321 growth or early stationary phase. Measurements of both *Nitrospina* strains (Nb-3 and Nb-211) were  
322 combined in this plot. Statistical significance (adj.  $p$ -value < 0.01) of within-condition comparisons are  
323 indicated by an asterisk (\*). Statistical results of all pairwise comparisons are reported in Table S2.  
324 Representative growth curves can be found in the Supporting Information (Fig. S2).  
325

326 We further explored the effect of multiple culture conditions, including environmentally  
327 relevant conditions of low substrate concentrations (1  $\mu\text{M}$ ) and low temperature (15°C), on DIC  
328 fixation yields of *Nitrosopumilus* sp. CCS1 and *Nitrospina* sp. Nb-3. We observed that *Nitrospina*  
329 sp. Nb-3 was ~1.4-times more efficient in converting energy to growth when grown in natural  
330 seawater compared to artificial seawater medium, which was not observed for *Nitrosopumilus* sp.  
331 CCS1 (Fig. 3). We hypothesize that reduced N compounds present in natural seawater  
332 (ammonium and/or organic N compounds) might be responsible for the observed differences due  
333 to the high metabolic costs (6 reducing equivalents) associated with assimilatory  $\text{NO}_2^-$  reduction  
334 (Einsle et al. 2002). Additions of ammonium or tryptone to artificial seawater medium likewise  
335 resulted in significantly higher DIC fixation yields (Fig. 3, Fig. S3), corroborating this hypothesis.  
336 Environmental populations of *Nitrospinae* have previously been shown to favor ammonium and  
337 the organic N sources urea and cyanate over nitrite (Kitzinger et al. 2020). Our data suggest that  
338 in addition to urea and cyanate, marine NOB can assimilate more complex organic N sources  
339 such as peptides and/or amino acids thereby saving energy that can instead be invested in C  
340 assimilation. The two most recent estimates for global ocean DIC fixation by NOB differ by one  
341 order of magnitude (Pachiadaki et al. 2017; Zhang et al. 2020) (Table S3), potentially also  
342 reflecting some of these uncertainties. Furthermore, we observed slightly higher DIC fixation  
343 yields of *Nitrosopumilus* sp. CCS1 in HEPES-buffered artificial seawater compared to unbuffered  
344 culture medium (Fig. 3), which coincided with higher cellular C quota (Table 1). While we cannot  
345 explain these observations, the differences in DIC fixation yield did not seem to be caused by  
346 variations in pH, which remained constant in unbuffered culture medium containing low substrate  
347 concentrations (1  $\mu\text{M}$   $\text{NH}_4^+$ ).

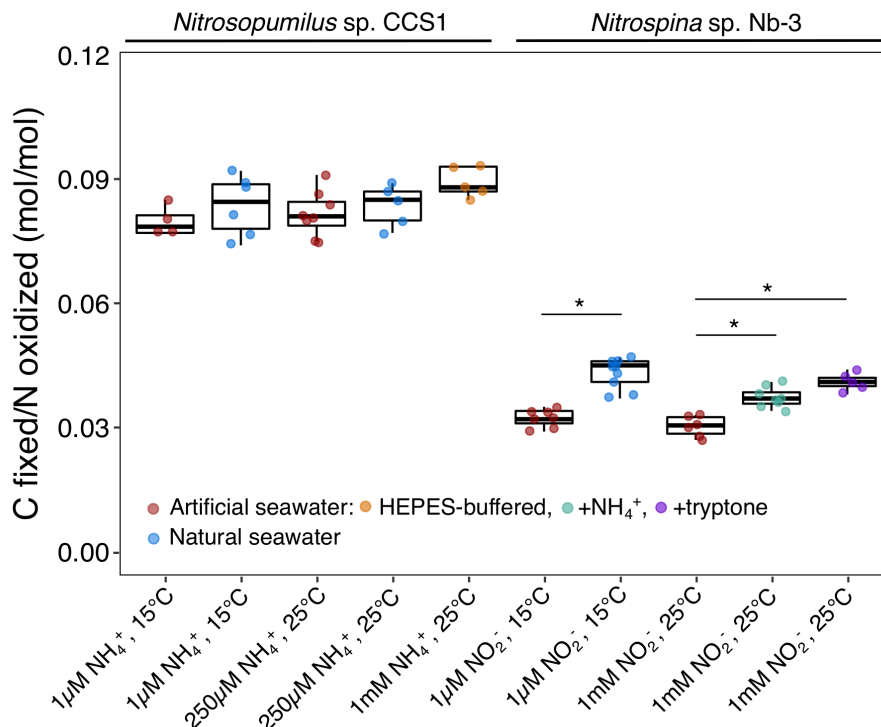

348  
 349 **Fig. 3** DIC fixation yields of *Nitrosopumilus* sp. CCS1 and *Nitrospina* sp. Nb-3 under different culture  
 350 conditions (substrate concentrations: 1µM, 250µM, 1mM; temperature: 15°C, 25°C) and culture media  
 351 (natural seawater, artificial seawater, HEPES-buffered artificial seawater). Plotted values include both, the  
 352 fraction of C incorporated into biomass and the fraction of C released as DOC. Ammonium (50µM) or  
 353 tryptone (150 mg L<sup>-1</sup>) served as additional, reduced nitrogen source for *Nitrospina* sp. Nb-3. Statistical  
 354 significance (adj. *p*-value <0.01) of within-condition comparisons are indicated by an asterisk (\*). Statistical  
 355 results of pairwise comparisons are reported in Table S2.

356  
 357 The theoretical Gibbs free energy release ( $\Delta G$ ) for conditions in our study was 3.6-times  
 358 higher for ammonia compared to nitrite oxidation (Table 2), yet DIC fixation yields of  
 359 *Nitrosopumilus* sp. CCS1 and *Ca. Nitrosopelagicus brevis* U25 (Table 2) were only 2 to 2.6-times  
 360 higher compared to *Nitrospina* sp. Nb-3. Similar observations were made by Kitzinger et al (2020)  
 361 who reported that Nitrospinae bacteria in low O<sub>2</sub> waters of the Gulf of Mexico are more efficient  
 362 in translating energy gained from nitrite to C assimilation than AOA are in translating energy  
 363 gained from ammonia oxidation. In addition to thermodynamics and the efficiency of the DIC  
 364 fixation pathway itself, additional factors can contribute to realized energy yields, including the  
 365 requirement of four out of six generated electrons by ammonia monooxygenase to reduce



366 molecular oxygen in ammonia oxidizers (Stahl and de la Torre 2012; Caranto and Lancaster  
 367 2018). When considering that a maximum of 53.8% of the energy released from catabolism are  
 368 available to ammonia oxidizers for growth (González-Cabaleiro et al. 2019), AOA appear to have  
 369 slightly higher DIC fixation efficiencies compared to NOB encoding the rTCA cycle (Table 2).  
 370 While oxygen protection likely increases the energy demands of the rTCA cycle (Berg 2011), our  
 371 results indicate that the cycle is also highly efficient under oxic conditions that are found in most  
 372 regions of the global ocean.

373  
 374 **Table 2.** Thermodynamic considerations and comparison of DIC fixation efficiencies and biomass yields of  
 375 marine AOA and NOB grown under environmentally relevant conditions (substrate concentration: 1μM;  
 376 temperature: 15°C) in artificial and natural seawater medium. Gibbs free energy calculations for NH<sub>3</sub>  
 377 oxidation and NO<sub>2</sub><sup>-</sup> oxidation can be found in Table S1.

|                                                             | <i>Ca. Nitrosopelagicus</i> U25 <sup>§</sup> |                      | <i>Nitrosopumilus</i> sp. CCS1 |                     | <i>Nitrospina</i> sp. Nb-3 |  |
|-------------------------------------------------------------|----------------------------------------------|----------------------|--------------------------------|---------------------|----------------------------|--|
| Culture medium                                              | Natural seawater                             | Artificial seawater  | Natural seawater               | Artificial seawater | Natural seawater           |  |
| <b>Gibbs free energy (kJ mol<sup>-1</sup>)</b>              | 280 / 151*                                   | 276 / 149*           | 276 / 149*                     | 77                  | 77                         |  |
| <b>DIC fixation yield (mol mol<sup>-1</sup>)</b>            | 0.111 ± 0.008                                | 0.080 ± 0.004        | 0.085 ± 0.008                  | 0.032 ± 0.002       | 0.043 ± 0.004              |  |
| <b>DIC fixation efficiency (μmol C kJ<sup>-1</sup>)</b>     | 396 ± 29 / 735 ± 53*                         | 290 ± 15 / 537 ± 27* | 308 ± 29 / 570 ± 54*           | 416 ± 26            | 558 ± 52                   |  |
| <b>Biomass yield<sup>&amp;</sup> (gBio gN<sup>-1</sup>)</b> | 0.187 ± 0.019                                | 0.135 ± 0.010        | 0.143 ± 0.019                  | 0.056 ± 0.005       | 0.076 ± 0.010              |  |

379  
 380  
 381 <sup>§</sup>*Ca. Nitrosopelagicus* U25 was grown at 22°C with initial substrate concentrations of 50μM.  
 382 <sup>&</sup>The average chemical formula of bacterial biomass (CH<sub>1.7</sub>O<sub>0.4</sub>N<sub>0.2</sub>, (Popovic 2019)) was adjusted using the C:N ratios  
 383 from Table 1 (AOA: CH<sub>1.7</sub>O<sub>0.4</sub>N<sub>0.25</sub>; *Nitrospina*: CH<sub>1.7</sub>O<sub>0.4</sub>N<sub>0.29</sub>).  
 384 \*When considering 53.8% of the energy released is available for growth according to González-Cabaleiro et al. 2019.

385  
 386 Multiple studies have used estimates of DIC fixation yields to infer DIC fixation rates  
 387 associated with nitrification in diverse marine and estuarine environments (Dore and Karl 1996;  
 388 Lam et al. 2004; Wuchter et al. 2006; Middelburg 2011; Lee et al. 2015), and a value of 0.1 for

389 archaeal ammonia oxidation has widely been used in the literature (Wuchter et al. 2006;  
390 Reinthaler et al. 2010; Middelburg 2011) without direct experimental evidence. Previous  
391 measurements of DIC fixation yields were mainly derived from cultures of ammonia and nitrite  
392 oxidizers that are not representative for the majority of nitrifiers found in marine environments and  
393 were highly variable (AOB: 0.033-0.130; NOB: 0.013-0.031; (Prosser 1990) *and references*  
394 *therein*). The variations in DIC fixation yields we observe for marine nitrifiers across different  
395 species and culture conditions are comparably low within AOA (mean±sd=0.091 ± 0.012; n=47)  
396 and *Nitrospina/Nitrospira* (mean±sd=0.036 ± 0.005; n=56), suggesting that these values are more  
397 constrained than previous estimates and particularly useful for modelling approaches in marine  
398 systems.

399

#### 400 ***DOC release by chemolithoautotrophs***

401 We measured DOC release rates of ten nitrifier cultures and tested how different culture  
402 conditions affected the amount of DOC released in proportion to the amount of fixed DIC. All  
403 investigated strains released DOC during exponential growth, and DOC release ceased when  
404 cultures reached stationary phase (as determined by comparing the total amount of released DOC  
405 until late exponential vs stationary phase, see Fig. S4), suggesting that DOC release is a feature  
406 of metabolically active nitrifiers. This is in agreement with earlier observations of amino acid  
407 release by exponentially growing *Nitrosopumilus* cells (Bayer et al. 2019a). The amount of  
408 chemoautotrophically fixed DIC that was released as DOC by nitrifiers made up on average ~5-  
409 15% (Fig. 4a). This is within the range observed for phytoplankton, which released 2-10% and 4-  
410 42% of their photosynthetically fixed DIC in culture and environmental studies, respectively  
411 (Carlson 2002), *and references therein*).

412 DOC release varied between closely related species (Fig. 4a). *Nitrosopumilus piranensis*  
413 released more DOC compared to the two other investigated *Nitrosopumilus* species, which is in  
414 agreement with (Bayer et al. 2019b) who reported higher amino acid release rates of *N. piranensis*

415 compared to *N. adriaticus*. Differences in the amount of released DOC have also been recently  
 416 reported between the closely related aquarium strain *Nitrosopumilus maritimus* SCM1 (9-19% of  
 417 fixed DIC) and the environmental strain *Nitrosopumilus maritimus* NAOA6 (5% of fixed DIC)  
 418 (Meador et al. 2020). Within NOB, *Nitrospina* sp. Nb-3 consistently released less DOC compared  
 419 to *N. gracilis* Nb-211 and the two phylogenetically more distantly related species *N. marina* and  
 420 *N. mobilis*.

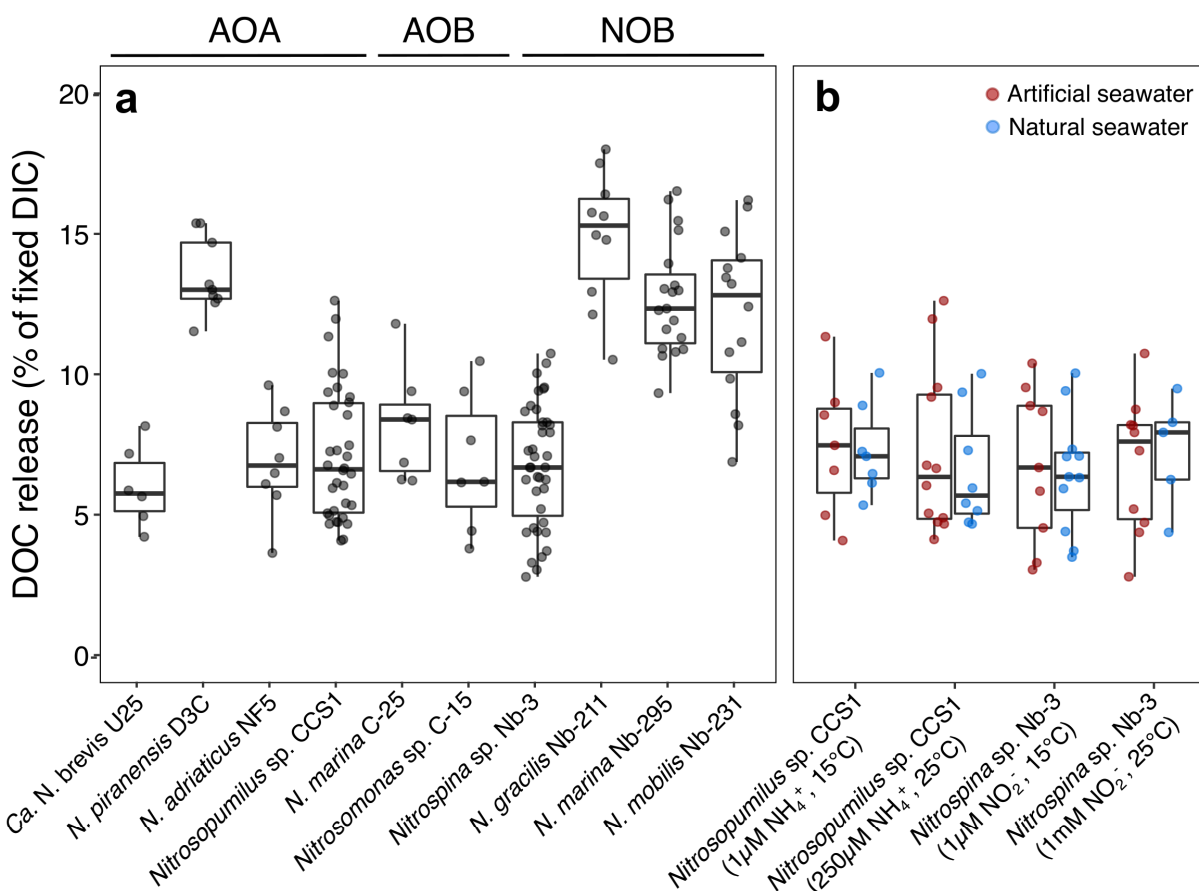

421  
 422  
 423 **Fig. 4** DOC release by marine nitrifiers as a fraction of fixed DIC. **a)** Comparison of DOC release by ten  
 424 different phylogenetically diverse marine nitrifiers. Values obtained from cultures grown under different  
 425 conditions (see panel b) are included in this plot. DOC release by *Ca. N. brevis* might be underestimated  
 426 due to the presence of heterotrophic bacteria that could take up some of the released DOC. **b)** Comparison  
 427 of DOC release by *Nitrosopumilus* sp. CCS1 and *Nitrospina* sp. Nb-3 grown under different culture  
 428 conditions (substrate concentrations: 1μM, 250μM, 1mM; temperature: 15°C, 25°C) in artificial or natural  
 429 seawater medium. Statistical results of all pairwise comparisons are reported in Table S2.

430 The fraction of released DOC remained constant across different culture conditions  
431 including environmentally relevant conditions of low substrate concentration (1  $\mu\text{M}$ ) and at low  
432 temperature (15°C) in natural seawater (Fig. 4b). This suggests that DOC release is not an artifact  
433 of unrealistic culture conditions but likely a feature exhibited by nitrifier populations in the  
434 environment. While the composition of DOM released by bacterial nitrifiers is currently unknown,  
435 a fraction of the DOM released by AOA has been shown to consist of labile compounds, such as  
436 amino acids, thymidine and B vitamins, that can limit microbial heterotrophic activity in open ocean  
437 waters (Bayer et al. 2019a).

438

## 439 **Conclusions**

440 Our results suggest that DIC fixation yields of marine NOB might be underestimated by  
441 conventional short-term tracer incubations, due to a partial decoupling between  $\text{NO}_2^-$  oxidation  
442 and C assimilation. Additionally, DIC fixation yields of *Nitrospina* were positively affected by the  
443 presence of ammonium or complex organic N compounds, which might influence metabolic  
444 interactions with ammonia oxidizers and/or heterotrophic prokaryotes in the environment,  
445 suggesting a potentially underappreciated role for competition in the N cycle (Santoro 2016).

446 DIC fixation yields of marine nitrifiers obtained in our study will help to further constrain  
447 the relationship between C and N fluxes in the nitrification process and inform theoretical models  
448 about how to connect observations at microscale to regional and global scales. Using a mean  
449 global value of organic C export from the euphotic zone of  $\sim 6 \text{ Pg C yr}^{-1}$  (Siegel et al. 2014) and  
450 a mean C:N ratio of sinking marine particles (at the surface) of  $\sim 7.1$  (Schneider et al. 2003), we  
451 estimate that the resulting global ocean organic N export of  $\sim 0.85 \text{ Pg yr}^{-1}$  could fuel up to  $0.13 \text{ Pg}$   
452  $\text{C yr}^{-1}$  of chemoautotrophic DIC fixation ( $0.094 \text{ Pg C yr}^{-1}$  by AOA and  $0.037 \text{ Pg C yr}^{-1}$  by NOB) in the  
453 dark ocean, which is lower than previous estimates ( $0.15\text{-}1.4 \text{ Pg C yr}^{-1}$ , see Table S3 and  
454 references therein). Furthermore, we show that nitrifiers release significant amounts of DOC

455 under environmentally relevant conditions, equating to fluxes of 0.006-0.02 Pg C y<sup>-1</sup> of fixed DIC  
456 released as DOC. Elucidating the lability and fate of the DOM released by nitrifiers will be crucial  
457 to understand its implications for the marine carbon cycle.

458

## 459 **Acknowledgements**

460 We thank Thomas Reinthaler for advice on DIC fixation measurements and for sharing his lab  
461 protocols, and Elisa Halewood and Janice Jones for support and advice with setting up the DIC  
462 fixation method in the lab. We also thank Sylvia Kim for total alkalinity and pH measurements,  
463 Kenneth Marchus for elemental (CHN) analyses, Christopher Sedlacek for sending culture stocks  
464 of *N. adriaticus* and *N. piranensis*, Claus Pelikan for advice on statistical analyses, and Holger  
465 Daims for advice on bioenergetic considerations. Frederica Valois and John B. Waterbury are  
466 acknowledged for their decades long commitment and maintenance of the nitrifier culture  
467 collection at the Woods Hole Oceanographic Institution. This research was supported by a  
468 Simons Foundation Early Career Investigator in Marine Microbiology and Evolution Award  
469 (345889) and a US National Science Foundation (NSF) award OCE-1924512 to AES. BB was  
470 supported by the Austrian Science Fund (FWF) Project Number: J4426-B (“The influence of  
471 nitrifiers on the oceanic carbon cycle”). Support for CAC was provided by Simons Foundation  
472 International’s BIOS-SCOPE program.

473

474 The authors declare no conflict of interest.

475

476

## 477 **References**

478 Amend, J. P., and D. E. LaRowe. 2019. Minireview: demystifying microbial reaction energetics.  
479 *Environmental Microbiology* **21**: 3539–3547. doi:10.1111/1462-2920.14778

- 480 Amend, J. P., and E. L. Shock. 2001. Energetics of overall metabolic reactions of thermophilic  
481 and hyperthermophilic Archaea and Bacteria. *FEMS Microbiology Reviews* **25**: 175–243.  
482 doi:10.1016/S0168-6445(00)00062-0
- 483 Bayer, B., R. L. Hansman, M. J. Bittner, B. E. Noriega-Ortega, J. Niggemann, T. Dittmar, and G.  
484 J. Herndl. 2019a. Ammonia-oxidizing archaea release a suite of organic compounds  
485 potentially fueling prokaryotic heterotrophy in the ocean. *Environmental Microbiology* **21**:  
486 4062–4075. doi:10.1111/1462-2920.14755
- 487 Bayer, B., C. Pelikan, M. J. Bittner, T. Reinthaler, M. Könneke, G. J. Herndl, and P. Offre. 2019b.  
488 Proteomic Response of Three Marine Ammonia-Oxidizing Archaea to Hydrogen Peroxide  
489 and Their Metabolic Interactions with a Heterotrophic Alphaproteobacterium. *mSystems* **4**:  
490 e00181-19. doi:10.1128/mSystems.00181-19
- 491 Bayer, B., M. A. Saito, M. R. McIlvin, S. Lüscher, D. M. Moran, T. S. Lankiewicz, C. L. Dupont, and  
492 A. E. Santoro. 2021. Metabolic versatility of the nitrite-oxidizing bacterium *Nitrospira marina*  
493 and its proteomic response to oxygen-limited conditions. *ISME Journal* **15**: 1025–1039.  
494 doi:10.1038/s41396-020-00828-3
- 495 Bayer, B., J. Vojvoda, P. Offre, and others. 2016. Physiological and genomic characterization of  
496 two novel marine thaumarchaeal strains indicates niche differentiation. *ISME Journal* **10**:  
497 1051–1063. doi:10.1038/ismej.2015.200
- 498 Bayer, B., J. Vojvoda, T. Reinthaler, C. Reyes, M. Pinto, and G. J. Herndl. 2019c. *Nitrosopumilus*  
499 *adriaticus* sp. nov. and *Nitrosopumilus piranensis* sp. nov., two ammonia-oxidizing archaea  
500 from the Adriatic Sea and members of the class Nitrososphaeria. *International Journal of*  
501 *Systematic and Evolutionary Microbiology* **7**: 1892–1902. doi:10.1099/ijsem.0.003360
- 502 Benjamini, Y., and Y. Hochberg. 1995. Controlling the False Discovery Rate: A Practical and  
503 Powerful Approach to Multiple Testing. *Journal of the Royal Statistical Society: Series B*  
504 (Methodological) **57**: 289–300. doi:<https://doi.org/10.1111/j.2517-6161.1995.tb02031.x>

- 505 Berg, C., L. Listmann, V. Vandieken, A. Vogts, and K. Jürgens. 2014. Chemoautotrophic growth  
506 of ammonia-oxidizing Thaumarchaeota enriched from a pelagic redox gradient in the Baltic  
507 Sea. *Frontiers in Microbiology* **5**: 786. doi:10.3389/fmicb.2014.00786
- 508 Berg, I. A. 2011. Ecological aspects of the distribution of different autotrophic CO<sub>2</sub> fixation  
509 pathways. *Applied and Environmental Microbiology* **77**: 1925–1936.  
510 doi:10.1128/AEM.02473-10
- 511 Bock, E., and M. Wagner. 2013. Oxidation of Inorganic Nitrogen Compounds as an Energy  
512 Source, p. 83–118. *In* E. Rosenberg, E.F. DeLong, S. Lory, E. Stackebrandt, and F.  
513 Thompson [eds.], *The Prokaryotes: Prokaryotic Physiology and Biochemistry*. Springer  
514 Berlin Heidelberg.
- 515 Buchwald, C., A. E. Santoro, R. H. R. Stanley, and K. L. Casciotti. 2015. Nitrogen cycling in the  
516 secondary nitrite maximum of the eastern tropical North Pacific off Costa Rica. *Global  
517 Biogeochemical Cycles* **29**: 2061–2081. doi:10.1002/2015GB005187
- 518 Caranto, J. D., and K. M. Lancaster. 2018. Nitric oxide is an obligate bacterial nitrification  
519 intermediate produced by hydroxylamine oxidoreductase. *Proceedings of the National  
520 Academy of Sciences* **115**: E8325–E8325. doi:10.1073/pnas.1812827115
- 521 Carlson, C. A. 2002. Chapter 4 - Production and Removal Processes, p. 91–151. *In* D.A. Hansell  
522 and C.A. Carlson [eds.], *Biogeochemistry of Marine Dissolved Organic Matter*. Academic  
523 Press.
- 524 Carlson, C. A., D. A. Hansell, N. B. Nelson, D. A. Siegel, W. M. Smethie, S. Khatiwala, M. M.  
525 Meyers, and E. Halewood. 2010. Dissolved organic carbon export and subsequent  
526 remineralization in the mesopelagic and bathypelagic realms of the North Atlantic basin.  
527 *Deep-Sea Research Part II: Topical Studies in Oceanography* **57**: 1433–1445.  
528 doi:10.1016/j.dsr2.2010.02.013
- 529 Choy, C. A., B. N. Popp, C. C. S. Hannides, and J. C. Drazen. 2015. Trophic structure and food  
530 resources of epipelagic and mesopelagic fishes in the north pacific subtropical Gyre

- 531 ecosystem inferred from nitrogen isotopic compositions. *Limnology and Oceanography* **60**:  
532 1156–1171. doi:10.1002/lno.10085
- 533 Dickson, A. G., C. L. Sabine, and J. R. Christian, eds. 2007. Guide to best practices for ocean  
534 CO<sub>2</sub> measurements, PICES Special Publication 3.
- 535 Dore, J. E., and D. M. Karl. 1996. Nitrification in the euphotic zone as a source for nitrite, nitrate,  
536 and nitrous oxide at Station ALOHA. *Limnology and Oceanography* **41**: 1619–1628.  
537 doi:10.4319/lo.1996.41.8.1619
- 538 Einsle, O., A. Messerschmidt, R. Huber, P. M. H. Kroneck, and F. Neese. 2002. Mechanism of  
539 the Six-Electron Reduction of Nitrite to Ammonia by Cytochrome c Nitrite Reductase. *Journal*  
540 *of the American Chemical Society* **124**: 11737–11745. doi:10.1021/ja0206487
- 541 Füssel, J., S. Lücker, P. Yilmaz, and others. 2017. Adaptability as the key to success for the  
542 ubiquitous marine nitrite oxidizer *Nitrococcus*. *Science Advances* **3**: 2–10.  
543 doi:10.1126/sciadv.1700807
- 544 Giering, S. L. C., R. Sanders, R. S. Lampitt, and others. 2014. Reconciliation of the carbon budget  
545 in the ocean's twilight zone. *Nature* **507**: 480–483. doi:10.1038/nature13123
- 546 Glover, H. E. 1985. The relationship between inorganic nitrogen oxidation and organic carbon  
547 production in batch and chemostat cultures of marine nitrifying bacteria. *Archives of*  
548 *Microbiology* **142**: 45–50. doi:10.1007/BF00409235
- 549 González-Cabaleiro, R., T. P. Curtis, and I. D. Ofițeru. 2019. Bioenergetics analysis of ammonia-  
550 oxidizing bacteria and the estimation of their maximum growth yield. *Water Research* **154**:  
551 238–245. doi:10.1016/j.watres.2019.01.054
- 552 Hannides, C. C. S., B. N. Popp, C. Anela Choy, and J. C. Drazen. 2013. Midwater zooplankton  
553 and suspended particle dynamics in the North Pacific Subtropical Gyre: A stable isotope  
554 perspective. *Limnology and Oceanography* **58**: 1931–1946. doi:10.4319/lo.2013.58.6.1931



- 555 Hansman, R. L., S. Griffin, J. T. Watson, E. R. M. Druffel, A. E. Ingalls, A. Pearson, and L. I.  
556 Aluwihare. 2009. The radiocarbon signature of microorganisms in the mesopelagic ocean.  
557 Proc. Natl. Acad. Sci. USA **106**: 6513–6518. doi:10.1073/pnas.0810871106
- 558 Herndl, G. J., T. Reinthaler, E. Teira, H. van Aken, C. Veth, A. Pernthaler, and J. Pernthaler. 2005.  
559 Contribution of Archaea to total prokaryotic production in the deep Atlantic Ocean. Applied  
560 and environmental microbiology **71**: 2303–2309. doi:10.1128/AEM.71.5.2303
- 561 Hoshijima, U., and G. E. Hofmann. 2019. Variability of seawater chemistry in a kelp forest  
562 environment is linked to in situ transgenerational effects in the purple sea urchin,  
563 *Strongylocentrotus purpuratus*. Frontiers in Marine Science **6**: 62.  
564 doi:10.3389/fmars.2019.00062
- 565 Kitzinger, K., H. K. Marchant, L. A. Bristow, and others. 2020. Single cell analyses reveal  
566 contrasting life strategies of the two main nitrifiers in the ocean. Nature Communications **11**.  
567 doi:10.1038/s41467-020-14542-3
- 568 Könneke, M., A. E. Bernhard, J. R. de la Torre, C. B. Walker, J. B. Waterbury, and D. A. Stahl.  
569 2005. Isolation of an autotrophic ammonia-oxidizing marine archaeon. Nature **437**: 543–546.  
570 doi:10.1038/nature03911
- 571 Könneke, M., D. M. Schubert, P. C. Brown, and others. 2014. Ammonia-oxidizing archaea use  
572 the most energy-efficient aerobic pathway for CO<sub>2</sub> fixation. Proceedings of the National  
573 Academy of Sciences of the United States of America **111**: 8239–8244.  
574 doi:10.1073/pnas.1402028111
- 575 Lam, P., J. P. Cowen, and R. D. Jones. 2004. Autotrophic ammonia oxidation in a deep-sea  
576 hydrothermal plume. FEMS Microbiology Ecology **47**: 191–206. doi:10.1016/S0168-  
577 6496(03)00256-3
- 578 Lee, D. Y., M. S. Owens, M. Doherty, E. M. Eggleston, I. Hewson, B. C. Crump, and J. C. Cornwell.  
579 2015. The Effects of Oxygen Transition on Community Respiration and Potential

- 580 Chemoautotrophic Production in a Seasonally Stratified Anoxic Estuary. *Estuaries and*  
581 *Coasts* **38**: 104–117. doi:10.1007/s12237-014-9803-8
- 582 Li, F., W. Xie, Q. Yuan, and others. 2018. Genome-scale metabolic model analysis indicates low  
583 energy production efficiency in marine ammonia-oxidizing archaea. *AMB Express* **8**: 0–11.  
584 doi:10.1186/s13568-018-0635-y
- 585 Lomas, M. W., and F. Lipschultz. 2006. Forming the primary nitrite maximum: Nitrifiers or  
586 phytoplankton? *Limnology and Oceanography* **51**: 2453–2467.  
587 doi:10.4319/lo.2006.51.5.2453
- 588 Lückner, S., B. Nowka, T. Rattei, E. Spieck, and H. Daims. 2013. The genome of *Nitrospina gracilis*  
589 illuminates the metabolism and evolution of the major marine nitrite oxidizer. *Frontiers in*  
590 *Microbiology* **4**: 27. doi:10.3389/fmicb.2013.00027
- 591 Lückner, S., M. Wagner, F. Maixner, and others. 2010. A *Nitrospira* metagenome illuminates the  
592 physiology and evolution of globally important nitrite-oxidizing bacteria. *Proceedings of the*  
593 *National Academy of Sciences of the United States of America* **107**: 13479–13484.  
594 doi:10.1073/pnas.1003860107
- 595 Marañón, E., P. Cermeño, E. Fernández, J. Rodríguez, and L. Zabala. 2004. Significance and  
596 mechanisms of photosynthetic production of dissolved organic carbon in coastal eutrophic  
597 ecosystems. *Limnology and Oceanography* **49**: 1652–1666. doi:10.4319/lo.2004.49.5.1652
- 598 Meador, T. B., N. Schoffelen, T. G. Ferdelman, O. Rebello, A. Khachikyan, and M. Könneke.  
599 2020. Carbon recycling efficiency and phosphate turnover by marine nitrifying archaea.  
600 *Science Advances* **6**. doi:10.1126/sciadv.aba1799
- 601 Middelburg, J. J. 2011. Chemoautotrophy in the ocean. *Geophysical Research Letters* **38**: 94–  
602 97. doi:10.1029/2011GL049725
- 603 Mueller, A. J., M. Y. Jung, C. R. Strachan, C. W. Herbold, R. H. Kirkegaard, M. Wagner, and H.  
604 Daims. 2021. Genomic and kinetic analysis of novel *Nitrospinae* enriched by cell sorting.  
605 *ISME Journal* **15**: 732–745. doi:10.1038/s41396-020-00809-6

- 606 Pachiadaki, M. G., E. Sintes, K. Bergauer, and others. 2017. Major role of nitrite-oxidizing bacteria  
607 in dark ocean carbon fixation. *Science* **358**: 1046–1051. doi:10.1126/science.aan8260
- 608 Pelletier, G. L. E. W. D. 2007. CO2SYS.xls: A calculator for the CO2 System in Seawater for  
609 Microsoft Excel/VBA . Washington State Department for Ecology, Olympia, WA; Brookhaven  
610 National Laboratory, Upton, NY.
- 611 Popovic, M. 2019. Thermodynamic properties of microorganisms: determination and analysis of  
612 enthalpy, entropy, and Gibbs free energy of biomass, cells and colonies of 32 microorganism  
613 species. *Heliyon* **5**. doi:10.1016/j.heliyon.2019.e01950
- 614 Prosser, J. I. 1990. Autotrophic Nitrification in Bacteria, p. 125–181. *In* A.H. Rose and D.W.  
615 Tempest [eds.]. Academic Press.
- 616 R Core Team. 2013. R: A language and environment for statistical computing. R Foundation for  
617 Statistical Computing, Vienna, Austria. <http://www.R-project.org>.
- 618 Reinthaler, T., H. M. van Aken, and G. J. Herndl. 2010. Major contribution of autotrophy to  
619 microbial carbon cycling in the deep North Atlantic’s interior. *Deep-Sea Research Part II:*  
620 *Topical Studies in Oceanography* **57**: 1572–1580. doi:10.1016/j.dsr2.2010.02.023
- 621 Santoro, A. E. 2016. The do-it-all nitrifier. *Science* **351**: 342–343.
- 622 Santoro, A. E., and K. L. Casciotti. 2011. Enrichment and characterization of ammonia-oxidizing  
623 archaea from the open ocean: Phylogeny, physiology and stable isotope fractionation. *ISME*  
624 *Journal* **5**: 1796–1808. doi:10.1038/ismej.2011.58
- 625 Santoro, A. E., K. L. Casciotti, and C. A. Francis. 2010. Activity, abundance and diversity of  
626 nitrifying archaea in the central California Current. *Environmental Microbiology* **12**: 1989–  
627 2006. doi:10.1111/j.1462-2920.2010.02205.x
- 628 Santoro, A. E., C. L. Dupont, R. A. Richter, and others. 2015. Genomic and proteomic  
629 characterization of “*Candidatus Nitrosopelagicus brevis*”: An ammonia-oxidizing archaeon  
630 from the open ocean. *Proc. Natl. Acad. Sci. USA* **112**: 1173–1178.  
631 doi:10.1073/pnas.1416223112

- 632 Santoro, A. E., R. A. Richter, and C. L. Dupont. 2019. Planktonic Marine Archaea. Annual Review  
633 of Marine Science **11**: 131–158. doi:10.1146/annurev-marine-121916-063141
- 634 Santoro, A. E., C. M. Sakamoto, J. M. Smith, and others. 2013. Measurements of nitrite production  
635 in and around the primary nitrite maximum in the central California Current. Biogeosciences  
636 **10**: 7395–7410. doi:10.5194/bg-10-7395-2013
- 637 Schneider, B., R. Schlitzer, G. Fischer, and E. M. Nöthig. 2003. Depth-dependent elemental  
638 compositions of particulate organic matter (POM) in the ocean. Global Biogeochemical  
639 Cycles **17**. doi:10.1029/2002gb001871
- 640 Siegel, D. A., K. O. Buesseler, S. C. Doney, S. F. Sailley, M. J. Behrenfeld, and P. W. Boyd. 2014.  
641 Global assessment of ocean carbon export by combining satellite observations and food-  
642 web models. Global Biogeochemical Cycles **28**: 181–196.  
643 doi:10.1002/2013GB004743.Received
- 644 Stahl, D. A., and J. R. de la Torre. 2012. Physiology and Diversity of Ammonia-Oxidizing Archaea.  
645 Annual Review of Microbiology **66**: 83–101. doi:10.1146/annurev-micro-092611-150128
- 646 Stein, L. Y., D. J. Arp, P. M. Berube, and others. 2007. Whole-genome analysis of the ammonia-  
647 oxidizing bacterium, *Nitrosomonas eutropha* C91: Implications for niche adaptation.  
648 Environmental Microbiology **9**: 2993–3007. doi:10.1111/j.1462-2920.2007.01409.x
- 649 Strickland, J. D. H., and T. R. Parsons. 1972. A Partical Handbook of Seawater Analysis. Fish.  
650 Res. Bd. Can., Bull. No. 167.
- 651 Tolar, B. B., M. J. Ross, N. J. Wallsgrove, Q. Liu, L. I. Aluwihare, B. N. Popp, and J. T. Hollibaugh.  
652 2016. Contribution of ammonia oxidation to chemoautotrophy in Antarctic coastal waters.  
653 ISME Journal **10**: 2605–2619. doi:10.1038/ismej.2016.61
- 654 Utåker, J. B., K. Andersen, Å. Aakra, B. Moen, and I. F. Nes. 2002. Phylogeny and functional  
655 expression of ribulose 1,5-bisphosphate carboxylase/oxygenase from the autotrophic  
656 ammonia-oxidizing bacterium *Nitrosospira* sp. isolate 40KI. Journal of Bacteriology **184**:  
657 468–478. doi:10.1128/JB.184.2.468-478.2002

- 658 Walker, C. B., J. R. de la Torre, M. G. Klotz, and others. 2010. Nitrosopumilus maritimus genome  
659 reveals unique mechanisms for nitrification and autotrophy in globally distributed marine  
660 crenarchaea. *Proceedings of the National Academy of Sciences* **107**: 8818–8823.  
661 doi:10.1073/pnas.0913533107
- 662 Ward, B. B. 2011. Nitrification in the Ocean, p. 325–346. *In* B.B. Ward, D.J. Arp, and M.G. Klotz  
663 [eds.], *Nitrification*. ASM Press.
- 664 Watson, S. W., E. Bock, F. W. Valois, J. B. Waterbury, and U. Schlosser. 1986. Nitrospira marina  
665 gen. nov. sp. nov.: a chemolithotrophic nitrite-oxidizing bacterium. *Archives of Microbiology*  
666 **144**: 1–7. doi:10.1007/BF00454947
- 667 Watson, S. W., and J. B. Waterbury. 1971. Characteristics of two marine nitrite oxidizing bacteria,  
668 Nitrospina gracilis nov. gen. nov. sp. and Nitrococcus mobilis nov. gen. nov. sp. *Archiv für*  
669 *Mikrobiologie* **77**: 203–230. doi:10.1007/BF00408114
- 670 White, A. E., S. J. Giovannoni, Y. Zhao, K. Vergin, and C. A. Carlson. 2019. Elemental content  
671 and stoichiometry of SAR11 chemoheterotrophic marine bacteria. *Limnology &*  
672 *Oceanography Letters* **4**: 44–51. doi:10.1002/lol2.10103
- 673 Wuchter, C., B. Abbas, M. J. L. Coolen, and others. 2006. Archaeal nitrification in the ocean. *Proc.*  
674 *Natl. Acad. Sci. USA* **103**: 12317–12322.
- 675 Zhang, Y., W. Qin, L. Hou, and others. 2020. Nitrifier adaptation to low energy flux controls  
676 inventory of reduced nitrogen in the dark ocean. *Proceedings of the National Academy of*  
677 *Sciences of the United States of America* **117**: 4823–4830. doi:10.1073/pnas.1912367117  
678
